# Supplementary material for: Designing anisotropic inorganic nanocapsules via self-assembly of polymer-like ultrathin Au nanowires
Source: Royal Society of Chemistry journal article supplement (doi:10.1039/d2nr01749k), 2022-01-01
Supplement: d2nr01749k1.pdf [file d2nr01749k1.pdf]

## Supplementary Information

### **Designing anisotropic inorganic nanocapsules via self-assembly of polymer-like ultrathin**

#### **Au nanowires**

Xingyun Li,<sup>a†</sup> Sai Zhang,<sup>a†</sup> Yuan Chen,<sup>b</sup> Shanshan Wang,<sup>c</sup> Qingchi Xu<sup>\*a</sup> and Jun Xu<sup>\*a,d</sup>

<sup>a</sup> Department of Physics, Research Institute for Biomimetics and Soft Matter, Fujian Provincial Key Laboratory for Soft Functional Materials, Xiamen University, Xiamen 361005 Fujian, China

<sup>b</sup> Department of Biomedical Engineering, College of Design and Engineering, National university of Singapore, Singapore 119077, Singapore

<sup>c</sup> Department of Chemistry, College of materials, Xiamen University, Xiamen 361005 Fujian, China

<sup>d</sup> Shenzhen Research Institute of Xiamen University, Shenzhen 518057, Guangdong, China.

† These authors contributed equally to this work.

\* Corresponding author (email: [xujun@xmu.edu.cn](mailto:xujun@xmu.edu.cn) (J. Xu); [xuqingchi@xmu.edu.cn](mailto:xuqingchi@xmu.edu.cn) (Q. C. Xu))

## **EXPERIMENTAL SECTION**

### **Materials**

All chemicals were used without further purification. Au (III) chloride trihydrate ( $\text{HAuCl}_4 \cdot 3\text{H}_2\text{O}$ ) was purchased from Sigma Aldrich. Oleylamine (OAm) was purchased from J&K Scientific Co., Ltd. (Beijing, China). Triisopropylsilane (TIPS) was purchased from Alfa Aesar. Other chemicals were purchased from Xilong Chemical Co., Ltd. (Shantou, China).

### **Preparation of ultrathin Au NWs**

Ultrathin Au NWs (Au NWs) were prepared following a previously reported method.<sup>1</sup> First, 3 mg of  $\text{HAuCl}_4 \cdot 3\text{H}_2\text{O}$  was dissolved in 2.5 mL tetrahydrofuran (THF). Then 100  $\mu\text{L}$  of oleylamine (OAm) was added to form a yellow mixture, followed by adding 150  $\mu\text{L}$  of triisopropylsilane (TIPS). The mixed solution was incubated at room temperature for 5 h. The color of the solution changed from yellow to dark brown, demonstrating the successful production of long ultrathin Au NWs. The as-synthesized ultrathin Au NWs were purified by centrifugation and redispersed in the THF for further use.

### **Assembly of Au NWs**

300  $\mu\text{L}$  of ethanol purified NWs were redissolved in 400  $\mu\text{L}$  of THF. Then 1 mL of 8 mM sodium dodecyl sulfate (SDS) solution was quickly injected under vigorous stirring. The mixture was heated at 60 °C for 2 h without sealing to remove THF. The as-synthesized Au nanocapsules were purified by centrifugation and redispersed in the deionized water for further use. Au nanorings were prepared by the same method except using 200  $\mu\text{L}$  as-synthesized Au NWs.

### **Incorporation of pyrene into Au nanocapsules**

During the assembly process of nanocapsules, 30  $\mu\text{l}$  pyrene (10 mg/mL) was added. After the assembly, the obtained nanocapsules with pyrene loaded were washed by  $\text{H}_2\text{O}$  (centrifugated at

1000 rpm for 5 minutes) 3 times in order to remove the extra pyrene and surfactant. Then the nanocapsules were dissolved in 1 mL H<sub>2</sub>O.

### **Quantification of the pyrene loaded by Au nanocapsules**

First, certain amount of Au nanocapsules with pyrene was incubated in a DMF solution (1 mL) at 80 °C for 4 h. This solution was then centrifuged to remove the nanomaterials. The pyrene loading was quantified by a standard curve based on UV/Vis spectra. The absorbance of pyrene loaded Au nanocapsules at 339 nm was 1.7641.

### **Fluorescence measurements of the pyrene release**

The pyrene-loaded Au nanocapsules (30 µL) were added to different release media (4 mL), namely, H<sub>2</sub>O, 0.3% SDS (in PBS; pH 5.5), 0.3% SDS (in PBS; pH 7.4). For all measurements the emission intensity at 395 nm was recorded every two minutes at an excitation wavelength of 334 nm. The excitation and emission slits were kept at 5 nm.

### **Characterization**

Scanning electron microscope (SEM) images were obtained on SU-70 with the accelerating voltage of 10 kV. Transmission electron microscope (TEM) images were taken from JEM-1400 operated at 100 kV. Viscosity curve was measured from an Anton Paar MCR302 rotational rheometer using CP25-2-SN rotor and gap=0.10 mm. Samples were all at a concentration of 3mg/mL. In the kinetic experiments, the fluorescence was measured on Fluoromax-4 in a cuvette of 1 cm pathlength. The excitation and emission slits were kept at 5 nm; and the excitation wavelength was at 334 nm.

## SUPPLEMENTARY FIGURES

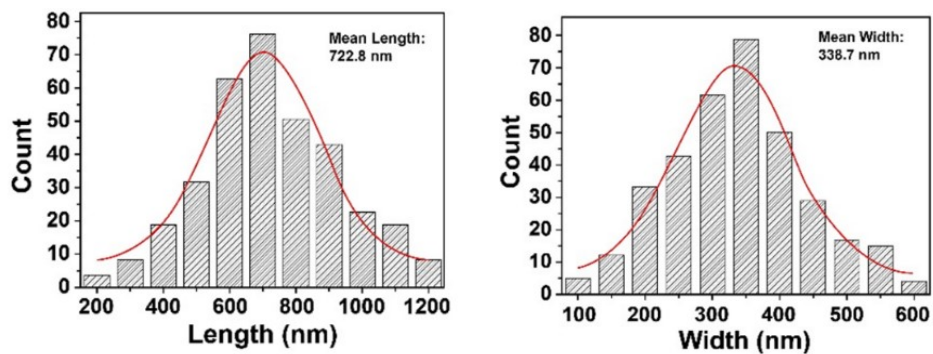

**Figure S1.** The size distributions of Au nanocapsules.

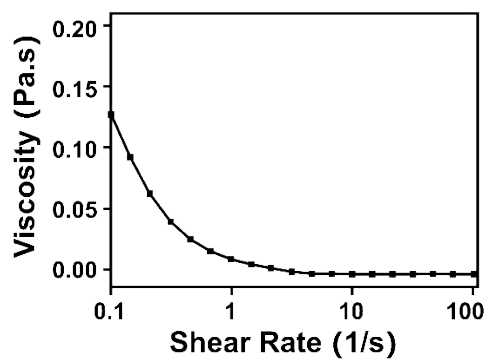

**Figure S2.** Viscosity versus shear rate of Au nanocapsules.

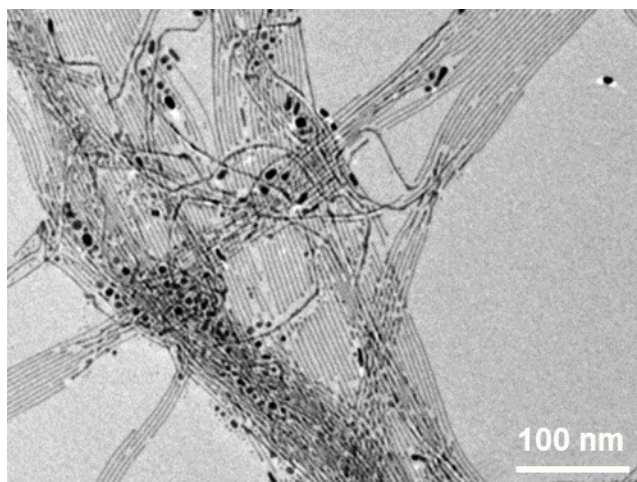

**Figure S3.** The nanoparticles found in the prepared nanowires.

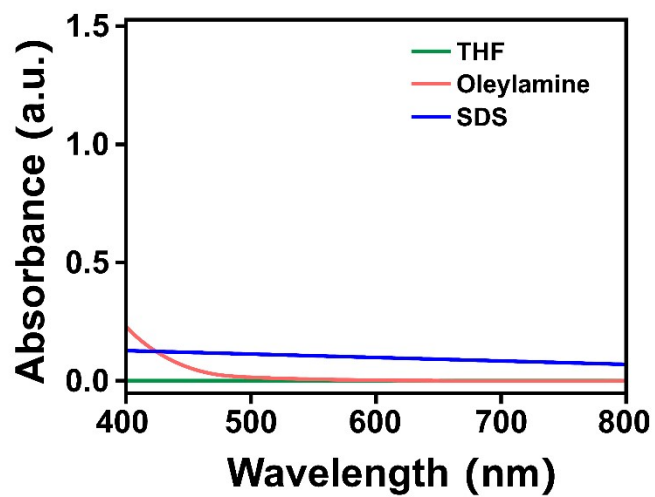

**Figure S4.** UV-vis spectra of THF, oleylamine and SDS.

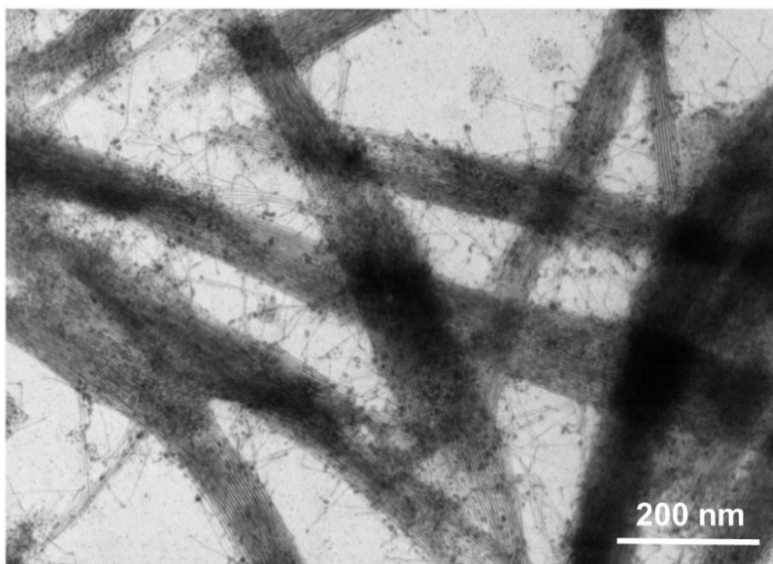

**Figure S5.** TEM image of bunched secondary structure assembled by Au NWs.

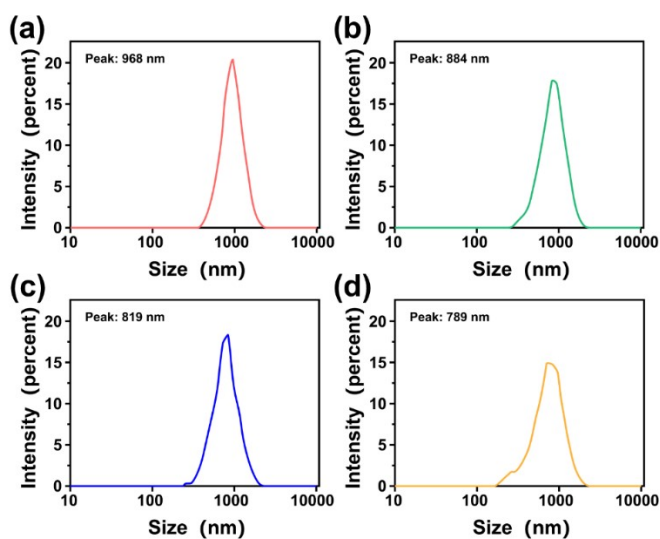

**Figure S6.** At different moments of the assembly process, the nanowires were collected, and the sizes of the assemblies were measured. The four figures show particle size distribution measurements at (a) 30 min, (b) 60 min, (c) 90 min and (d) 120 min, respectively.

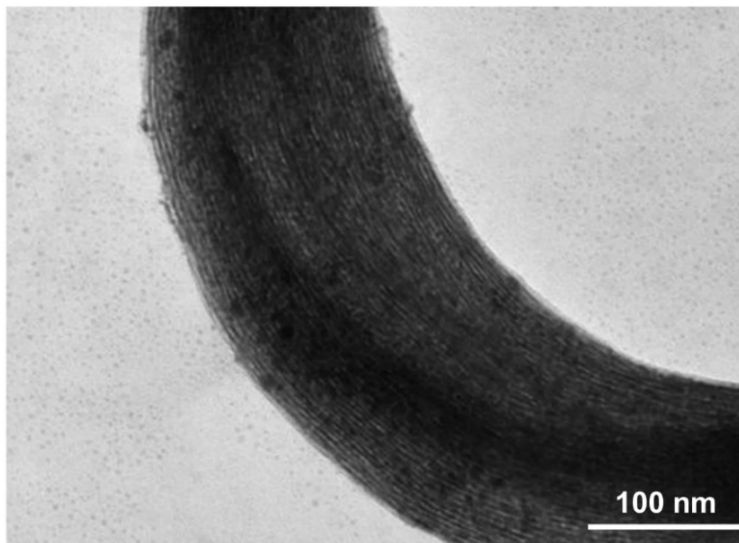

**Figure S7.** TEM image of the nanorings assembled by parallel Au nanowires.

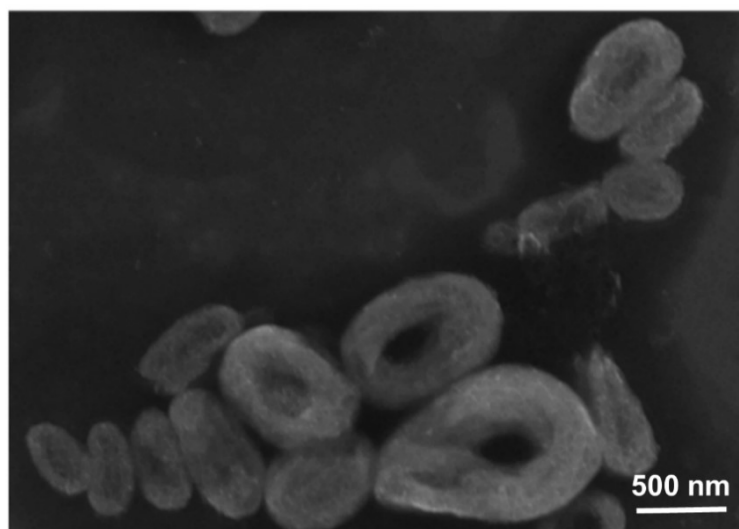

**Figure S8.** TEM image of the products assembled by Au NWs with high THF content after heating for 4 h.

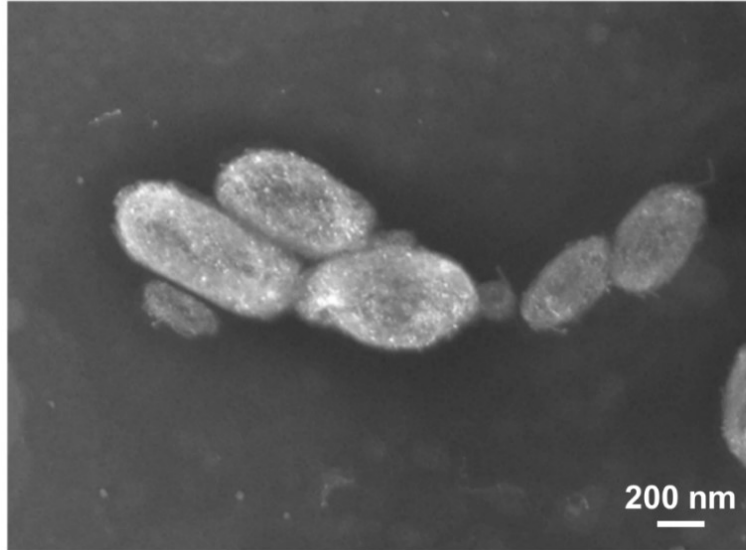

**Figure S9.** SEM image of Au nanocapsules loaded with pyrene.

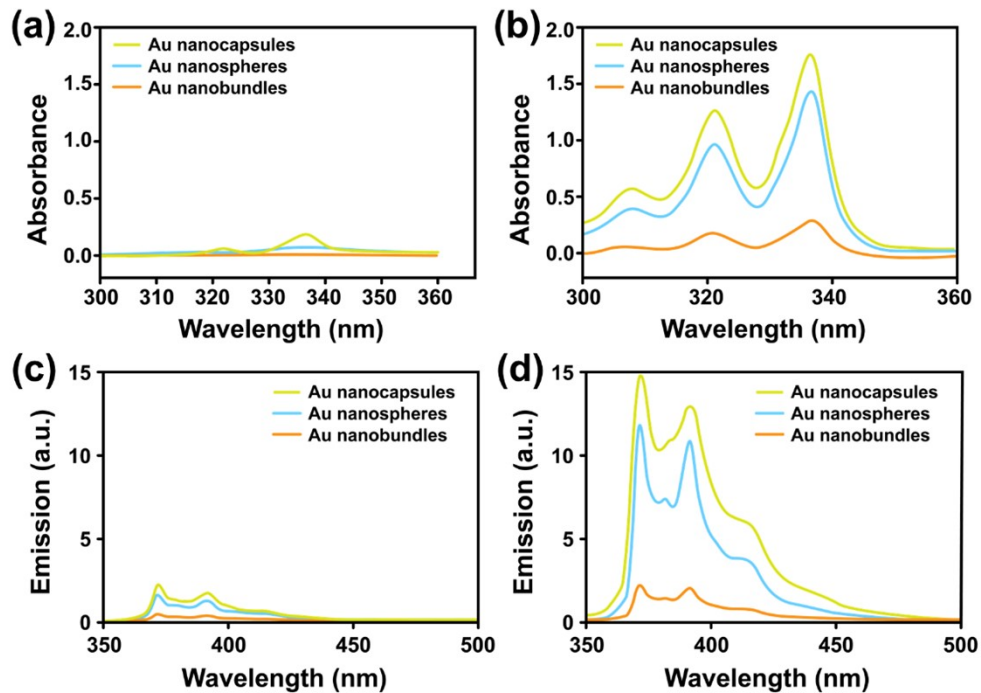

**Figure S10.** Ultraviolet absorption spectra of the DMF solution of pyrene loaded three carriers (a) before and (b) after release. Fluorescence emission spectra of the DMF solution of pyrene loaded three carriers (c) before and (d) after release.



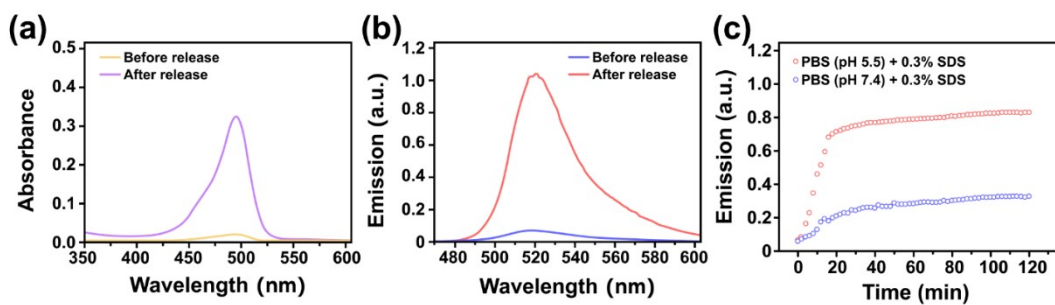

**Figure S11.** (a) Ultraviolet absorption spectra and (b) fluorescence emission spectra of the DMF solution of Rhodamine 110 loaded Au nanocapsules before and after release. (c) The release curve of Rhodamine 110 loaded Au nanocapsules in PBS with different pH.

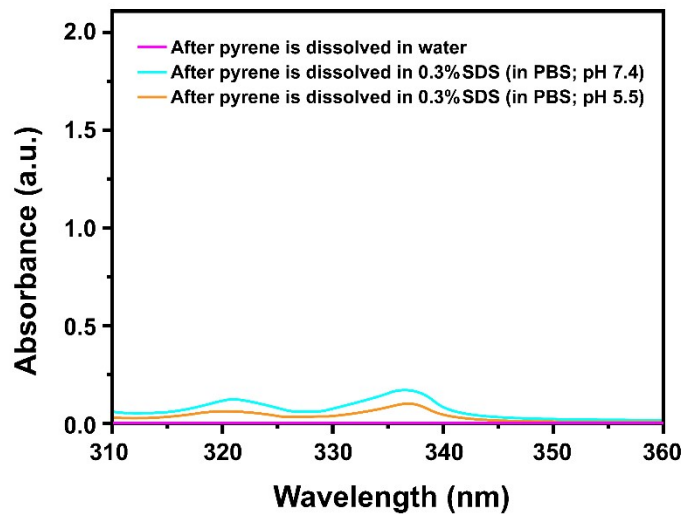

**Figure S12.** Solubility of pyrene under different conditions.

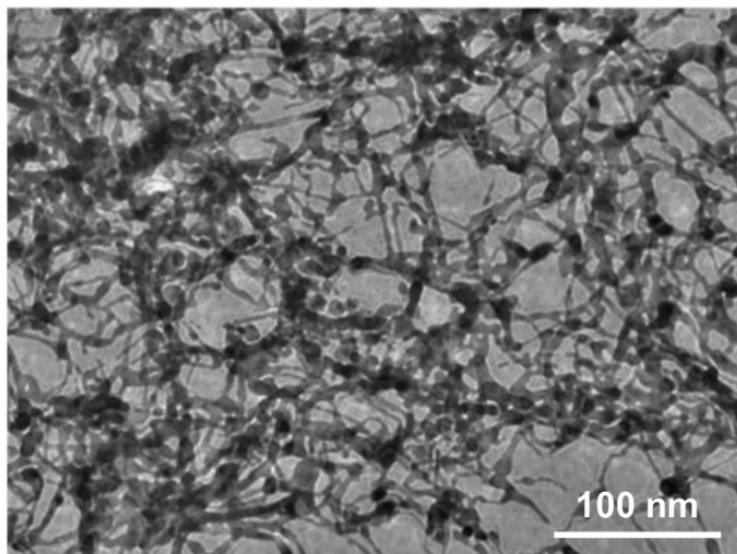

**Figure S13.** TEM image of Au nanocapsules after release in SDS solution with pH=5.5.

**Table S1.** The influences of four factors on the morphology.

| Regulatory Factors       |                             | Forces              |                 |              | Morphologies                                              |
|--------------------------|-----------------------------|---------------------|-----------------|--------------|-----------------------------------------------------------|
|                          |                             | Interfacial Tension | Molecular Force | Strain Force |                                                           |
| Au NWs concentration     | Low                         | -                   | ↓               | ↓            | Nanorings                                                 |
|                          | High                        | -                   | ↑               | ↑            | Nanobundles                                               |
| THF concentration        | Low                         | ↑                   | -               | -            | Deformed nanobundles                                      |
|                          | High                        | ↓                   | -               | -            | Transition states between nanotubes to nanocapsules       |
| Oleylamine concentration | None                        | ↑                   | ↓               | -            | Scattered NWs                                             |
|                          | High                        | ↓                   | ↑               | -            | Nanobundles with oil droplets inside                      |
| Temperature              | No heating, short time      | ↓                   | ↓               | -            | Nanobundles and a few loose nanorings                     |
|                          | No heating, long time (2 h) | ↓                   | ↓               | -            | Transition states between loose nanotubes to nanocapsules |

**Table S2.** The diffusion kinetic fitting results in Figure 4d.

| Model          | Equation*              | PBS (pH 7.4) + 0.3% SDS |                             | PBS (pH 5.5) + 0.3% SDS |                             |
|----------------|------------------------|-------------------------|-----------------------------|-------------------------|-----------------------------|
|                |                        | k                       | Correlation coefficient (R) | k                       | Correlation coefficient (R) |
| Zero-order     | $Q=Q_0+kt$             | 0.019±0.002             | 0.7147                      | 0.026±0.004             | 0.4651                      |
| First-order    | $Q/Q_0=1-e^{-kt}$      | 0.048±0.002             | 0.9698                      | 0.134±0.009             | 0.9396                      |
| Higuchi        | $Q=kt^{1/2}$           | 0.71±0.02               | 0.2135                      | 1.22±0.04               | 0.2301                      |
| Ritger-Peppas  | $Q=kt^n$               | 3.31±0.14               | 0.8119                      | 6.50±0.19               | 0.8956                      |
| Hixson-Crowell | $Q^{1/3}-Q_0^{1/3}=kt$ | 0.31±0.02               | 0.1844                      | 0.56±0.03               | 0.3409                      |

\*Q represents the amount of drug released at time t;  $Q_0$  is the initial amount of drug; k is the release constant.

## References

1. H. Feng, Y. Yang, Y. You, G. Li, J. Guo, T. Yu, Z. Shen, T. Wu and B. Xing, *Chemical Communications*, 2009, 1984-1986.
